# Supplementary material for: Disruption of Epithelial Barrier of Caco-2 Cell Monolayers by Excretory Secretory Products of Trichinella spiralis Might Be Related to Serine Protease
Source: PubMed Central journal article supplement (PMC8013981; doi:10.3389/fmicb.2021.634185), 2021-03-17
Supplement: Data_Sheet_1.pdf [file Data_Sheet_1.pdf]

## Supporting information

### S1 Appendix.

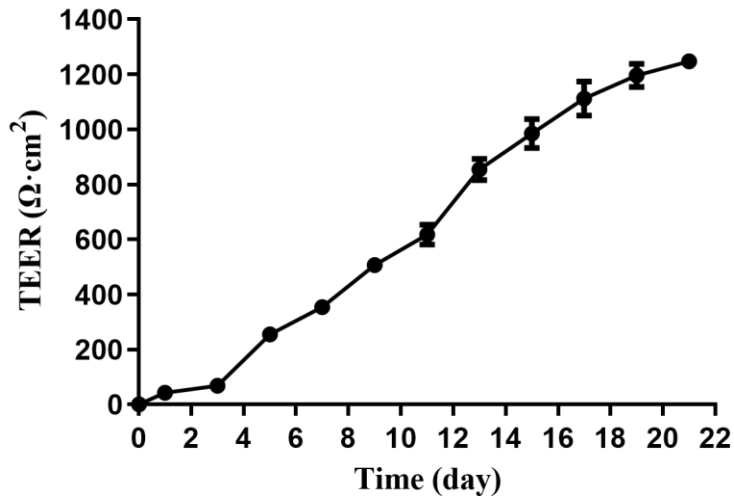

S1 Appendix. Changes in resistance of Caco-2 cells after 21 days of culture. Values are presented as mean  $\pm$  SD, n = 3.

### S2 Appendix.

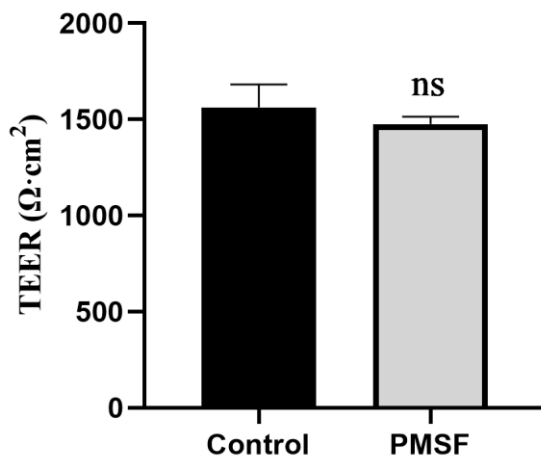

S2 Appendix. The effect of PMSF on TEER. Values are presented as mean  $\pm$  SD, n = 3. NS=No significant (t-tests).
